1  
2  
3  
4  
5  
6  
7  
8  
9  
10  
11  
12  
13  
14  
15  
16  
17  
18  
19  
20  
21  
22  
23  
24  
25  
26  
27  
28  
29  
30  
31  
32

**Molecular effects of mannanase-hydrolyzed coprameal to intestinal immunity in the Pacific white shrimp (*Litopenaeus vannamei*)**

Wanilada Rungrassamee<sup>1\*</sup>, Sopacha Arayamethakorn<sup>1</sup>, Nitsara Karoonuthaisiri<sup>1</sup>, Shih-Chu Chen<sup>2</sup>, Eric Chang<sup>3</sup>, Samu Chan<sup>4</sup>, Yasuhiko Yoshida<sup>5</sup>, Motohiro Maebuchi<sup>5</sup>, Masahisa Ibuki<sup>6</sup>

<sup>1</sup>Microarray Research Team, National Center for Genetic Engineering and Biotechnology, Pathum Thani, Khlong Luang, Thailand 12120

<sup>2</sup>Department of Veterinary Medicine and Graduate Institute of Animal Vaccine Technology, National Pingtung University of Science and Technology, 1 Shuehfu Rd, Neipu, Pingtung, Taiwan, ROC

<sup>3</sup>Terminalia Garden Aquatic Development, No.73-6 Guanghe Rd., Mituo Dist., Kaohsiung City 827, Taiwan

<sup>4</sup>Fukar International Co., Ltd., No.112, Sec2 Chang-an E. Rd., Zhongshan dist., Taipei, Taiwan

<sup>5</sup>Fuji Oil Co., Ltd., 1 Sumiyoshi-Cho, Izumisano-Shi, Osaka, 598-8540 Japan

<sup>6</sup>Japan Nutrition Co., Ltd., 1-1-1 Minamiaoyama, Minatoku, Tokyo, 107-0062 Japan

\*Correspondence to WR

Email: [wanilada.run@biotec.or.th](mailto:wanilada.run@biotec.or.th)

Running title: Shrimp immunity enhanced by mannanase-hydrolyzed copra meal

33 **Abstract**

34 To mitigate disease outbreak, an alternative approach through enhancing shrimp  
35 immunity was explored. Mannan oligosaccharides (MOS) have been previously  
36 reported to enhance shrimp immune system. Here, coprameal samples were digested  
37 with mannanase to yield MOS, namely, mannanase-hydrolyzed coprameal (MCM) and  
38 feasibility of MCM as shrimp immunostimulant in grow-out ponds was determined.  
39 Pacific white shrimp (*Litopenaeus vannamei*) were fed with the commercial diet  
40 containing 1% MCM as the MCM-supplemented group and compared to the non-MCM  
41 control diet. There was no significant difference in survival rates between the MCM-  
42 supplemented and the control groups throughout the 4-month-period of the trial ( $p >$   
43 0.05). Gene expression analysis in shrimp intestines revealed that the transcript levels of  
44 antimicrobial peptides (*anti-lipopolysaccharide factor isoform 1 (alf1)*, *penaeidin*  
45 (*pen3a*) and *crustin (crus)*) and lysozymes (*lyz*) were not significantly different in the  
46 MCM-supplemented group. Meanwhile, *C-type lectin* and *toll-like receptor* transcript  
47 levels, whose gene products play roles as pattern recognition proteins, were  
48 significantly higher in a group fed with MCM for 2- and 4-month periods than those of  
49 the control group ( $p < 0.05$ ). The increased transcript levels of *C-type lectin* and *toll-like*  
50 *receptor* provide evidence for potential implementation of MCM as feed supplement to  
51 modulate shrimp immune system.

52  
53 Keywords: copra meal; mannan oligosaccharides; Pacific white shrimp;  
54 immunostimulant

55

## 56 **Introduction**

57 Aquaculture production play important role to provide food sources for  
58 increasing global population. The global demand for shrimp and prawn production is  
59 approximately 70% of crustaceans (FAO 2018). This results in the rapid growth of  
60 cultivated shrimp production, in particularly, an expanding of Pacific white shrimp  
61 farming throughout many Asian countries. However, the shrimp industry continues to  
62 suffer from production losses due to the higher disease outbreak incidents. To mitigate  
63 shrimp diseases, much attention has been paid to development of feed additives with  
64 potential to enhance growth and immune performance as a mean to prevent disease  
65 outbreaks in aquaculture.

66 In mammals, prebiotics, which are non-digestible carbohydrates, are shown  
67 to selectively stimulate growth of beneficial bacteria in host digestive systems, and  
68 consequently, providing health benefits to their host animals (Al-Sheraji et al. 2013;  
69 Davani-Davari et al. 2019; Manning & Gibson 2004). Recently, prebiotics as  
70 immunostimulants have been applied in aquaculture as a promising approach for growth  
71 and immune enhancement (Hasan et al. 2019; Luna-González et al. 2012; Sang et al.  
72 2010; Staykov et al. 2007). Among those, mannan oligosaccharides (MOS), derived  
73 from yeast cell wall (*Saccharomyces cerevisiae*), have been shown to improve growth  
74 performance and enhance immune system of many aquatic animals (Dimitroglou et al.  
75 2010; Salem et al. 2015; Zhang et al. 2012; Zhang et al. 2020). In crustaceans,  
76 applications of MOS as feed additives has been reported to significantly improve the  
77 survival rate of crayfish (*Cherax tenuimanus*) (Sang et al. 2010), and enhance growth  
78 rates in tropic spiny lobster (*Panulirus ornatus*) (Do Huu & Jones 2014) and black tiger  
79 shrimp (*Penaeus monodon*) (Sang et al. 2014; Sang & Fotedar 2010) and freshwater  
80 crayfish (*Astacus leptodactylus*) (Mazlum et al. 2011). The dietary MOS from yeast can  
81 significantly increase intestinal microvilli length, growth and percent survival rates in  
82 the Pacific white shrimp (Gainza & Romero 2020; Zhang et al. 2012)

83 While MOS used in animal feed additives are mostly derived from yeast, MOS  
84 can also be obtained from other natural sources with high mannan sugar contents such  
85 as copra meal (Hossain et al. 1996; Kraikaew et al. 2020; Pangsri et al. 2015). Copra  
86 meal is a by-product from the coconut milk industry, and it is an alternative source for  
87 MOS in a form of  $\beta$ -1, 4 mannoooligosaccharides (Ariandi et al. 2015). The potential

88 applications of MOS from copra meal as immunostimulants have been explored in  
89 various animals such as broilers (Prayoonthien et al. 2017; Sundu et al. 2012) and the  
90 Pacific white shrimp (Chen et al. 2020; Li et al. 2018; Rungrassamee et al. 2014).  
91 Particularly, MOS from copra meal has been reported to improve immune levels and  
92 survival rates in the Pacific white shrimp juvenile under a pathogen exposure to *Vibrio*  
93 *harveyi* (Rungrassamee et al. 2014), providing a piece of evidence for MOS as a  
94 promising shrimp feed additive. Here, we further explored feasibility of MOS through  
95 mannanase-hydrolysis of copra meal (MCM) as feed additives in the grow-out pond  
96 systems and determined molecular effects on immune gene expression. These findings  
97 will lead to further development of MCM (MOS from copra meal) as effective  
98 prebiotics for shrimp to maintain their intestinal immunity in the grow-out phase.  
99

## 100 **Materials and methods**

### 101 *Preparation of mannanase-hydrolyzed coprameal (MCM)*

102       The copra meals were hydrolyzed using mannanase enzyme to yield mannanase-  
103 hydrolyzed coprameal (MCM). Briefly, the defatted copra meals were incubated with  
104 0.2-0.6% mannanase solution (15,000unit/g minimum, Shin-Nihon Chemical CO., Ltd.,  
105 Aichi, Japan) at 40-70 °C for 18-30 h, and then, dried 2-6 h to obtain MCM product.  
106 MCM content analysis was carried out using following methods. Mannobiose was  
107 determined by high-performance anion-exchange chromatography coupled with a  
108 pulsed amperometric detection (HPAEC-PAD) system, and constituent sugars were  
109 analyzed by sulfuric hydrolysis. Ashes were determined by a dry-ashing procedure  
110 at  $55 \pm 50^\circ\text{C}$  for 2 h and moisture was determined by oven drying method at  $105 \pm 1^\circ\text{C}$   
111 for 4 h. Fat was analyzed by a diethyl ether extraction method (AOAC Method 920.39).  
112 Protein content was determined with a Kjeldahl method (Lynch & Barbano 1999).

113

### 114 *Animal facility and feeding trials*

115 A group of 16-day-old Pacific white shrimp postlarvae was cultivated in the grow-out  
116 ponds at the animal facility (Terminalia Garden Aquatic development, Taiwan) (Fig.1).  
117 Shrimp were reared in brackish water with 0.07-0.15% salt concentrations and divided  
118 into two groups: a control feed with commercial feed pellets (a control diet) and a  
119 MCM-supplemented group (a test diet) (Table 1). The test diet was formulated to  
120 contain 1% of MCM in the commercial feed pellets. Shrimp were fed under these diets  
121 and intestine samples ( $N_{\text{pooled}} = 6$  with 5 replicates) were aseptically collected at 2- and  
122 4- month of the feeding trial period. All tissue samples were stored in RNAlater<sup>®</sup> RNA  
123 Stabilization Solution (Ambion, USA) to preserve tissue integrity for RNA extraction  
124 for gene expression analysis. Water quality in ponds was measured every other day for  
125 temperature, pH, and dissolved oxygen and weekly for ammonia–nitrogen, nitrite–  
126 nitrogen, and alkalinity levels and maintained at the standard ranges for rearing Pacific  
127 white shrimp (Rungrassamee et al. 2013).

128

### 129 *Total RNA extraction and cDNA synthesis*

130       Intestine tissues were homogenized in TRI REAGENT<sup>®</sup> (Molecular Research  
131 Center, USA) for RNA extraction according to supplier's instruction. RNA pellets were

132 washed twice with 500  $\mu$ L of 75% ice-cold ethanol, air-dried for 5 min, and dissolved in  
133 50  $\mu$ L diethylpyrocarbonate (DEPC)-treated water. To remove potential genomic DNA  
134 contamination, all RNA samples were treated with DNaseI enzyme (RQ1 RNase-free  
135 DNaseI, Promega, USA) for 60 min at 37 °C. The DNaseI treated-RNA samples were  
136 purified via phenol:chloroform extraction and precipitated with 1/10 volume of 3M  
137 sodium acetate and 1 volume of isopropanol as previously done (Rungrassamee et al.  
138 2010). All treated-RNA samples were confirmed to be free from genomic DNA via  
139 PCR reaction. RNA concentration was quantified with a Nanodrop ND-8000  
140 spectrophotometer (NanoDrop, UK). An ImProm-II™ Reverse Transcriptase System kit  
141 (Promega, USA) was used to synthesize the first strand cDNA using 1.5  $\mu$ g of the  
142 DNA-free RNA sample as a template and each reaction was carried out according to the  
143 supplier's protocol. The concentration of cDNA was measured by a Nanodrop ND-8000  
144 spectrophotometer.

145

146 *Realtime PCR analysis of immune related genes transcript levels in response to MCM*  
147 *supplement diet*

148 To determine MCM effects on expression levels of host immune genes, cDNA  
149 from each shrimp group after 2- and 4-month of the feeding trial periods were used as  
150 templates in realtime PCR analysis using a CFX96™ realtime system (Bio-rad  
151 Laboratories, USA). The transcript levels of immune-related genes chosen were anti-  
152 lipopolysaccharide factor1 (*alf1*), crustin (*crus*), c-type lectin (*c-lec*), lysozyme (*lyz*),  
153 penaeidin3 (*pen3a*) and Toll1 (*Toll1*) and the elongation factor-1 alpha (*EF1a*) was used  
154 as an internal control. Each realtime PCR reaction contained IQ™ SYBR Green  
155 Supermix (Bio-Rad, USA), gene-specific primer pair (1.25  $\mu$ M, Table 2) and cDNA  
156 (100 ng). The realtime PCR cycling parameters used were 95 °C for 3 min, 40 cycles of  
157 at 95 °C for 30 sec, 57 °C for 20 sec and 72 °C for 30 sec. The fluorescent signal  
158 intensities were recorded at the end of each cycle. Melting curve analysis was  
159 performed from 55°C to 95 °C with continuous fluorescence measurement at every 0.5  
160 °C increment. Relative abundance of the target immune genes in intestines of the  
161 Pacific white shrimp was determined by the  $\Delta\Delta$ ct method (Livak & Schmittgen 2001).  
162 The relative fold change for each target gene was compared between the MCM-  
163 supplement to the control groups at the same time point.

164

165 *Statistical analysis*

166 Statistical analysis was conducted using SPSS of Windows version 15.0 to  
167 perform Student's t test analysis for significant differences in shrimp weights or gene  
168 expression analysis (Landau & Everitt 2004).

169

170 **Results and discussion**

171 *MCM component analysis*

172 In this work, MOS supplement was derived in a form of mannanase-hydrolyzed  
173 coprameal (MCM). MCM yield was ~95% of the copra meal. The content analysis of  
174 MCM revealed high composition of carbohydrates (55.0%), followed by crude proteins  
175 (22.9%), fats (9.3%), moisture (7.0%) and ashes (5.8%) (Table 3). The free sugar  
176 contents in MCM were mainly mannobiose sugars (10.3%) and others were glucose,  
177 mannose, fructose, sucrose and mannotriose. Among those sugars, mannobiose has been  
178 reported for their important role as an immune modulator (Patel & Goyal 2012; Tiwari  
179 et al. 2020). For instance, mannobiose is able to activate innate immune response in  
180 chicken under *in vivo* and *in vitro* studies (Agunos et al. 2007; Duarte et al. 2014; Ibuki  
181 et al. 2010; Ibuki et al. 2011). This suggests that MCM supplementation in this study  
182 could potentially be used to enhance disease protection in animals.

183

184 *Expression analysis of the immune related in response to MCM supplementary diet*

185 Since shrimp digestive system, especially its intestine can be prone to pathogen  
186 invasion (Aguirre Guzman et al. 2010; Soonthornchai et al. 2015), it is important to  
187 determine approaches to modulate intestinal immune level. Hence, we selected genes  
188 encoding the antimicrobial peptides (*alf1*, *pen3a* and *crus*), lysozyme (*lyz*), C-type  
189 lectin (*c-lectin*), and Toll-like receptor protein (*Toll1*) as our genes of interest due to  
190 their important roles in digestive tract of the shrimp as part of host defense mechanisms  
191 against pathogens (Tassanakajon et al. 2013). To evaluate molecular effects of MCM  
192 supplement on host immune system, the relative expression levels of the  
193 aforementioned transcripts were compared in shrimp intestines at 2-month and 4-month  
194 after feeding with the MCM-supplement diet to those fed with the non-MCM as a  
195 control diet (Fig. 2). Our result showed that the MCM as dietary supplement did not

196 affect the transcript levels of *alfl*, *pen3a* and *crus*. Additionally, the group fed with  
197 MCM showed a significant decreased in transcript level of *lyz* at the 2-month of the  
198 MCM-feeding period ( $p < 0.05$ ), however the transcript level of *lyz* was not  
199 significantly different to the non-MCM diet at 4-month-period. This suggests that MCM  
200 did not have a direct effect on modulating antimicrobial peptides including lysozyme. In  
201 contrast, the *c-lectin* and *Toll1* expression levels were significantly higher than the  
202 control diet by ~2-fold when given MCM supplement diet at 2- and 4-month periods ( $p$   
203  $< 0.05$ ). This suggests that MCM supplement specifically increases expression levels of  
204 *c-lectin* and *Toll1*, whose gene products play role as pattern recognition proteins. The  
205 encoded C-type lectin is a member of lectin family proteins that has been reported to  
206 bind to carbohydrate in a calcium-dependent manner (Weis et al. 1998). It plays  
207 important role in pathogen recognition by detecting conserved pathogen cell wall  
208 components of Gram-negative bacteria and further induces immune response to  
209 invaders (Bi et al. 2020; Medzhitov & Janeway 2002; Wang & Wang 2013). Lectins  
210 show strong bacterial-agglutination and opsonic activity, which facilitate phagocytosis  
211 (Luo et al. 2006). In the Chinese white shrimp, C-type lectin has been demonstrated *in*  
212 *vivo* to mediate in *V. anguillarum* clearance (Wang et al. 2009). Thus, the induction of  
213 *C-lectin* could provide a local immune response and protection in Pacific white shrimp  
214 intestine against bacterial pathogen invasion. Similarly, *Toll1*, encodes for Toll-like  
215 receptor protein, was also significantly increased at 2- and 4-month of the MCM  
216 supplemented group in comparison to the control group. Toll-like receptor proteins have  
217 been reported in mammals to play roles in viral pathogen detection and mediate  
218 responses to those viruses (Takeuchi & Akira 2009). Interestingly, the function of *Toll1*  
219 in the Pacific white shrimp has not yet been linked to viral diseases protection in shrimp  
220 (Labreuche et al. 2009), but it has been shown to involve in responses to bacterial  
221 pathogen (Liu et al. 2016). This suggests that MCM is a promising candidate to increase  
222 disease resistance to bacterial pathogens in Pacific white shrimp farming. Further  
223 investigation on optimal dosages and formulation for the MCM supplement should be  
224 conducted for future application.

225 Here, we report that the feed supplement containing mannanase-hydrolyzed  
226 coprameal (MCM) was able to induce transcript levels of pathogen recognition proteins  
227 in the Pacific white shrimp. The significant increase was observable on Month 2 of the



228 feeding trial and the level remained similar on Month 4. Although future shrimp  
229 experiments fed with a range of MCM concentration might be necessary to fully  
230 elucidate beneficial effects of MCM. Our results provide a promising evidence for  
231 further implementation of MCM as feed supplements or immunostimulants to enhance  
232 shrimp health. Additionally, a comparison of shrimp survival rates under pathogen  
233 challenge between the MCM supplement shrimp group to non-MCM supplement  
234 control will strengthen the potential application of MCM as shrimp immunostimulant.

235

### 236 **Conflict of interest**

237 Yasuhiko Yoshida, Motohiro Maebuchi and Masahisa Ibuki are employees of Fuji Oil  
238 Co., Ltd. or Japan Nutrition Co., Ltd., whom kindly supplied mannanase-hydrolysis of  
239 copra meal (MCM) used in this study. They had no roles in experimental design and  
240 data analysis.

241

### 242 **Acknowledgements**

243 We thank Dr. Wonnop Visessanguan from National Center for Genetic Engineering and  
244 Biotechnology (BIOTEC, Thailand) for advice and insights on evaluation of shrimp  
245 feed additive. This project was supported the Thailand Research Fund (RSA5780022).

246  
247

## References

- 248  
249  
250 Aguirre Guzman G, Sánchez-Martínez J, Pérez-Castañeda R, Palacios A, Trujillo-  
251 Rodríguez T, and Ivan N. 2010. Pathogenicity and infection route of *Vibrio*  
252 *parahaemolyticus* in American white shrimp, *Litopenaeus vannamei*. *Journal of*  
253 *The World Aquaculture Society* 41:464-470. 10.1111/j.1749-7345.2010.00388.x  
254 Agunos A, Ibuki M, Yokomizo F, and Mine Y. 2007. Effect of dietary beta1-4  
255 mannanose in the prevention of *Salmonella enteritidis* infection in broilers.  
256 *British Poultry Science* 48:331-341. 10.1080/00071660701370442  
257 Al-Sheraji SH, Ismail A, Manap MY, Mustafa S, Yusof RM, and Hassan FA. 2013.  
258 Prebiotics as functional foods: A review. *Journal of Functional Foods* 5:1542-  
259 1553. <https://doi.org/10.1016/j.jff.2013.08.009>  
260 Ariandi, Yopi, and Meryandini A. 2015. Enzymatic hydrolysis of copra meal by  
261 mannanase from *Streptomyces* sp. BF3.1 for the production of  
262 mannoooligosaccharides. *HAYATI Journal of Biosciences* 22:79-86.  
263 <https://doi.org/10.4308/hjb.22.2.79>  
264 Bi J, Ning M, Xie X, Fan W, Huang Y, Gu W, Wang W, Wang L, and Meng Q. 2020.  
265 A typical C-type lectin, perlucin-like protein, is involved in the innate immune  
266 defense of whiteleg shrimp *Litopenaeus vannamei*. *Fish & Shellfish Immunology*  
267 103:293-301. <https://doi.org/10.1016/j.fsi.2020.05.046>  
268 Chen M, Chen X-Q, Tian L-X, Liu Y-J, and Niu J. 2020. Beneficial impacts on growth,  
269 intestinal health, immune responses and ammonia resistance of pacific white  
270 shrimp (*Litopenaeus vannamei*) fed dietary synbiotic (mannan oligosaccharide  
271 and *Bacillus licheniformis*). *Aquaculture Reports* 17:100408.  
272 <https://doi.org/10.1016/j.aqrep.2020.100408>  
273 Davani-Davari D, Negahdaripour M, Karimzadeh I, Seifan M, Mohkam M, Masoumi  
274 SJ, Berenjian A, and Ghasemi Y. 2019. Prebiotics: definition, types, sources,  
275 mechanisms, and clinical applications. *Foods (Basel, Switzerland)* 8:92.  
276 10.3390/foods8030092  
277 Dimitroglou A, Davies S, Sweetman J, Divanach P, and Chatzifotis S. 2010. Dietary  
278 supplementation of mannan oligosaccharide on white sea bream (*Diplodus*  
279 *sargus* L.) larvae: Effects on development, gut morphology and salinity  
280 tolerance. *Aquaculture Research* 41:e245-e251. 10.1111/j.1365-  
281 2109.2010.02513.x  
282 Do Huu H, and Jones CM. 2014. Effects of dietary mannan oligosaccharide  
283 supplementation on juvenile spiny lobster *Panulirus homarus* (Palinuridae).  
284 *Aquaculture* 432:258-264. <https://doi.org/10.1016/j.aquaculture.2014.05.013>  
285 Duarte K, Ibuki M, Fukui K, Kato M, Santos E, and Junqueira O. 2014. Effect of  
286 hydrolyzed copra meal separately or in combination with *Bacillus cereus* var.  
287 *toyoi* on growth performance of broiler chickens. *Acta Scientiarum - Animal*  
288 *Sciences* 36:373-377. 10.4025/actascianimsci.v36i4.22829  
289 FAO. 2018. *The state of world fisheries and aquaculture 2018 - meeting the sustainable*  
290 *development goals*. Rome: FAO.  
291 Gainza O, and Romero J. 2020. Effect of mannan oligosaccharides on the microbiota  
292 and productivity parameters of *Litopenaeus vannamei* shrimp under intensive  
293 cultivation in Ecuador. *Scientific Reports* 10:2719. 10.1038/s41598-020-59587-  
294 y

- 295 Hasan MT, Jang WJ, Lee J, Lee B-J, Lim S, Kang W, Han H-S, and Kong I-S. 2019.  
296 Effects of immunostimulants, prebiotics, probiotics, synbiotics, and potentially  
297 immunoreactive feed additives on Olive flounder (*Paralichthys olivaceus*): A  
298 Review. *Reviews in Fisheries Science & Aquaculture* 27.  
299 10.1080/23308249.2019.1622510
- 300 Hossain MZ, Abe J-i, and Hizukuri S. 1996. Multiple forms of  $\beta$ -mannanase from  
301 *Bacillus* sp. KK01. *Enzyme and Microbial Technology* 18:95-98.  
302 [https://doi.org/10.1016/0141-0229\(95\)00071-2](https://doi.org/10.1016/0141-0229(95)00071-2)
- 303 Ibuki M, Kovacs-Nolan J, Fukui K, Kanatani H, and Mine Y. 2010. Analysis of gut  
304 immune-modulating activity of beta-1,4-mannobiose using microarray and real-  
305 time reverse transcription polymerase chain reaction. *Poult Sci* 89:1894-1904.  
306 10.3382/ps.2010-00791
- 307 Ibuki M, Kovacs-Nolan J, Fukui K, Kanatani H, and Mine Y. 2011.  $\beta$  1-4 mannanase  
308 enhances Salmonella-killing activity and activates innate immune responses in  
309 chicken macrophages. *Vet Immunol Immunopathol* 139:289-295.  
310 10.1016/j.vetimm.2010.10.011
- 311 Kraikaew J, Morakul S, and Keawsompong S. 2020. Nutritional improvement of copra  
312 meal using mannanase and *Saccharomyces cerevisiae*. *3 Biotech* 10:274.  
313 10.1007/s13205-020-02271-9
- 314 Labreuche Y, O'Leary NA, de la Vega E, Veloso A, Gross PS, Chapman RW, Browdy  
315 CL, and Warr GW. 2009. Lack of evidence for *Litopenaeus vannamei* Toll  
316 receptor (IToll) involvement in activation of sequence-independent antiviral  
317 immunity in shrimp. *Developmental & Comparative Immunology* 33:806-810.  
318 10.1016/j.dci.2009.02.005
- 319 Landau S, and Everitt B. 2004. *A handbook of statistical analyses using SPSS*. Boca  
320 Raton, Florida: Chapman and Hall/ CRC Press LLC.
- 321 Li Y, Liu H, Dai X, Li J, and Ding F. 2018. Effects of dietary inulin and mannan  
322 oligosaccharide on immune related genes expression and disease resistance of  
323 Pacific white shrimp, *Litopenaeus vannamei*. *Fish & Shellfish Immunology*  
324 76:78-92. 10.1016/j.fsi.2018.02.034
- 325 Liu Y, Song L, Sun Y, Liu T, Hou F, and Liu X. 2016. Comparison of immune response  
326 in Pacific white shrimp, *Litopenaeus vannamei*, after knock down of Toll and  
327 IMD gene *in vivo*. *Developmental & Comparative Immunology* 60:41-52.  
328 10.1016/j.dci.2016.02.004
- 329 Livak KJ, and Schmittgen TD. 2001. Analysis of relative gene expression data using  
330 real-time quantitative PCR and the 2(-Delta Delta C(T)) Method. *Methods*  
331 25:402-408. 10.1006/meth.2001.1262
- 332 Luna-González A, Almaraz-Salas JC, Fierro-Coronado JA, Flores-Miranda MdC,  
333 González-Ocampo HA, and Peraza-Gómez V. 2012. The prebiotic inulin  
334 increases the phenoloxidase activity and reduces the prevalence of WSSV in  
335 whiteleg shrimp (*Litopenaeus vannamei*) cultured under laboratory conditions.  
336 *Aquaculture* 362-363:28-32. <https://doi.org/10.1016/j.aquaculture.2012.07.022>
- 337 Luo T, Yang H, Li F, Zhang X, and Xu X. 2006. Purification, characterization and  
338 cDNA cloning of a novel lipopolysaccharide-binding lectin from the shrimp  
339 *Penaeus monodon*. *Developmental & Comparative Immunology* 30:607-617.  
340 10.1016/j.dci.2005.10.004

- 341 Lynch JM, and Barbano DM. 1999. Kjeldahl nitrogen analysis as a reference method  
342 for protein determination in dairy products. *Journal of AOAC International*  
343 82:1389-1398.
- 344 Manning TS, and Gibson GR. 2004. Microbial-gut interactions in health and disease.  
345 Prebiotics. *Best Practice & Research Clinical Gastroenterology* 18:287-298.  
346 10.1016/j.bpg.2003.10.008
- 347 Mazlum Y, Yılmaz E, Genç MA, and Guner O. 2011. A preliminary study on the use of  
348 mannan oligosaccharides (MOS) in freshwater crayfish, *Astacus leptodactylus*  
349 Eschscholtz, 1823 juvenile diets. *Aquaculture International* 19:111-119.  
350 10.1007/s10499-010-9345-4
- 351 Medzhitov R, and Janeway CA, Jr. 2002. Decoding the patterns of self and nonself by  
352 the innate immune system. *Science* 296:298-300. 10.1126/science.1068883
- 353 Pangri P, Piwpankaew Y, Ingkakul A, Nitisinprasert S, and Keawsompong S. 2015.  
354 Characterization of mannanase from *Bacillus circulans* NT 6.7 and its  
355 application in mannooligosaccharides preparation as prebiotic. *Springerplus*  
356 4:771. 10.1186/s40064-015-1565-7
- 357 Patel S, and Goyal A. 2012. The current trends and future perspectives of prebiotics  
358 research: a review. *3 Biotech* 2:115-125. 10.1007/s13205-012-0044-x
- 359 Prayoonthien P, Nitisinprasert S, and Keawsompong S. 2017. *In vitro* fermentation of  
360 copra meal hydrolysate by chicken microbiota. *3 Biotech* 8:41. 10.1007/s13205-  
361 017-1058-1
- 362 Rungrassamee W, Kingcha Y, Srimarut Y, Maibunkaew S, Karoonuthaisiri N, and  
363 Visessanguan W. 2014. Mannooligosaccharides from copra meal improves  
364 survival of the Pacific white shrimp (*Litopenaeus vannamei*) after exposure to  
365 *Vibrio harveyi*. *Aquaculture* 434:403-410.  
366 <https://doi.org/10.1016/j.aquaculture.2014.08.032>
- 367 Rungrassamee W, Leelatanawit R, Jiravanichpaisal P, Klinbunga S, and Karoonuthaisiri  
368 N. 2010. Expression and distribution of three heat shock protein genes under  
369 heat shock stress and under exposure to *Vibrio harveyi* in *Penaeus monodon*.  
370 *Developmental & Comparative Immunology* 34:1082-1089. S0145-  
371 305X(10)00125-4 [pii] 10.1016/j.dci.2010.05.012 [doi]
- 372 Rungrassamee W, Maibunkaew S, Karoonuthaisiri N, and Jiravanichpaisal P. 2013.  
373 Application of bacterial lipopolysaccharide to improve survival of the black  
374 tiger shrimp after *Vibrio harveyi* exposure. *Developmental & Comparative*  
375 *Immunology* 41:257-262. <http://dx.doi.org/10.1016/j.dci.2013.05.021>
- 376 Salem M, Gaber M, Zaki M, and Nour A. 2015. Effects of dietary mannan  
377 oligosaccharides on growth, body composition and intestine of the sea bass  
378 (*Dicentrarchus labrax* L.). *Aquaculture Research* 47. 10.1111/are.12801
- 379 Sang H, Fotedar R, and Filer K. 2010. Effects of dietary mannan oligosaccharide on the  
380 survival, growth, immunity and digestive enzyme activity of freshwater crayfish,  
381 *Cherax destructor* Clark (1936). *Aquaculture Nutrition* 17:e629-e635.  
382 10.1111/j.1365-2095.2010.00812.x
- 383 Sang H, Kien NT, and Nguyen Thi Thanh T. 2014. Effects of dietary mannan  
384 oligosaccharide on growth, survival, physiological, immunological and gut  
385 morphological conditions of black tiger prawn (*Penaeus monodon* Fabricius  
386 1798). *Aquaculture Nutrition* 20. 10.1111/anu.12083
- 387 Sang HM, and Fotedar R. 2010. Effects of mannan oligosaccharide dietary  
388 supplementation on performances of the tropical spiny lobsters juvenile

- 389           (*Panulirus ornatus*, Fabricius 1798). *Fish & Shellfish Immunology* 28:483-489.  
390           10.1016/j.fsi.2009.12.011
- 391       Soonthornchai W, Chaiyapechara S, Jarayabhand P, Söderhäll K, and Jiravanichpaisal  
392       P. 2015. Interaction of *Vibrio spp.* with the inner surface of the digestive tract of  
393       *Penaeus monodon*. *PLoS One* 10:e0135783. 10.1371/journal.pone.0135783
- 394       Staykov Y, Spring P, Denev S, and Sweetman J. 2007. Effect of a manna  
395       oligosaccharide on the growth performance and immune status of rainbow trout  
396       (*Oncorhynchus mykiss*). *Aquaculture International* 15:153–161 15.  
397       10.1007/s10499-007-9096-z
- 398       Sundu B, Hutta U, and Chaudhry A. 2012. Potential use of beta mannan from copra  
399       meal as a feed additive for broilers. *World's Poultry Science Journal* 68:707-  
400       716. 10.1017/S0043933912000839
- 401       Takeuchi O, and Akira S. 2009. Innate immunity to virus infection. *Immunological*  
402       *Reviews* 227:75-86. 10.1111/j.1600-065X.2008.00737.x
- 403       Tassanakajon A, Somboonwiwat K, Supungul P, and Tang S. 2013. Discovery of  
404       immune molecules and their crucial functions in shrimp immunity. *Fish &*  
405       *Shellfish Immunology* 34:954-967. <https://doi.org/10.1016/j.fsi.2012.09.021>
- 406       Tiwari UP, Fleming SA, Abdul Rasheed MS, Jha R, and Dilger RN. 2020. The role of  
407       oligosaccharides and polysaccharides of xylan and mannan in gut health of  
408       monogastric animals. *Journal of nutritional science* 9:e21-e21.  
409       10.1017/jns.2020.14
- 410       Wang XW, and Wang JX. 2013. Diversity and multiple functions of lectins in shrimp  
411       immunity. *Developmental & Comparative Immunology* 39:27-38.  
412       10.1016/j.dci.2012.04.009
- 413       Wang XW, Zhang XW, Xu WT, Zhao XF, and Wang JX. 2009. A novel C-type lectin  
414       (FcLec4) facilitates the clearance of *Vibrio anguillarum in vivo* in Chinese white  
415       shrimp. *Developmental & Comparative Immunology* 33:1039-1047.  
416       10.1016/j.dci.2009.05.004
- 417       Weis WI, Taylor ME, and Drickamer K. 1998. The C-type lectin superfamily in the  
418       immune system. *Immunological Reviews* 163:19-34. 10.1111/j.1600-  
419       065x.1998.tb01185.x
- 420       Zhang J, Liu Y, Tian L, Yang H, Liang G, and Xu D. 2012. Effects of dietary mannan  
421       oligosaccharide on growth performance, gut morphology and stress tolerance of  
422       juvenile Pacific white shrimp, *Litopenaeus vannamei*. *Fish & Shellfish*  
423       *Immunology* 33:1027-1032. <https://doi.org/10.1016/j.fsi.2012.05.001>
- 424       Zhang P, Yang F, Hu J, Han D, Liu H, Jin J, Yang Y, Yi J, Zhu X, and Xie S. 2020.  
425       Optimal form of yeast cell wall promotes growth, immunity and disease  
426       resistance in gibel carp (*Carassius auratus gibelio*). *Aquaculture Reports*  
427       18:100465. <https://doi.org/10.1016/j.aqrep.2020.100465>
- 428
- 429

430 **Table 1.** Composition of feed diets used in this study.  
431

| <b>Raw material</b>   | <b>% Feed composition</b> |                            |
|-----------------------|---------------------------|----------------------------|
|                       | <b>Control diet</b>       | <b>MCM supplement diet</b> |
| Wheat flour           | 35                        | 35                         |
| Fish meal             | 20                        | 20                         |
| Squid meal            | 10                        | 10                         |
| Water                 | 30                        | 29                         |
| Vitamin and yeast mix | 5                         | 5                          |
| MCM                   | 0                         | 1                          |

432  
433  
434

435 **Table 2.** Primer sequences used in realtime PCR analysis  
436

| <b>Gene</b>                                     | <b>GenBank Accession Number</b> | <b>Primer</b>      | <b>Sequence (5'-3')</b>                               |
|-------------------------------------------------|---------------------------------|--------------------|-------------------------------------------------------|
| Anti-lipopolysaccharide factor1 ( <i>alf1</i> ) | EW713395                        | alf1_F<br>alf1_R   | AGGACCTCATCCCTTCGCTAGT<br>GGACACCACATCCTGCCATTGA      |
| Crustin ( <i>crus</i> )                         | AF430074                        | crus_F<br>crus_R   | CCACAACCTGTTCCAACGACTACAA<br>AAACCTGCGATCCGAAGAATGAGG |
| C-type lectin ( <i>c-lec</i> )                  | JF834160                        | lec_F<br>lec_R     | CGCTGATGGCTCGGATGAGA<br>AGGCTGAGTTCGGTGGCAATAG        |
| Lysozyme ( <i>lyz</i> )                         | AF425673                        | lyz_F<br>lyz_R     | GGAGTTCGAGTCGTCCTTCAACA<br>GTAGTCGCTTCCGCACCAGTA      |
| Penaedin3 ( <i>pen3a</i> )                      | Y14926                          | pen3a_F<br>pen3a_R | CGTGGTCTGCCTGGTCTTCTT<br>CAAAGGTCTCACGAAGGGTGGT       |
| Toll1 ( <i>Toll1</i> )                          | DQ923424                        | Toll1_F<br>Toll1_R | CGAGAGCGAGTTGGACGAGAAG<br>CCTGTGGGTGTGGCATGATGTA      |
| Elongation factor-1 alpha ( <i>EF1a</i> )       | GU136229                        | EF1a_F<br>EF1a_R   | CGTCGCTTCCGACTCGAAGAA<br>TGGCAATCAAGCACAGGTGAGTAG     |

437  
438  
439



440 **Table 3.** Content analysis of mannanase-hydrolyzed coprameal (MCM).  
441

|                            | <b>Component in MCM (%)</b> |      |
|----------------------------|-----------------------------|------|
| <b>General composition</b> | Crude protein               | 22.9 |
|                            | Crude fat                   | 9.3  |
|                            | Ash                         | 5.8  |
|                            | Moisture                    | 7.0  |
|                            | Carbohydrate                | 55.0 |
| <b>Free sugar contents</b> | Glucose                     | 1.5  |
|                            | Mannose                     | 2.6  |
|                            | Fructose                    | 1.8  |
|                            | Sucrose                     | 4.6  |
|                            | Mannobiose                  | 10.3 |
|                            | Mannotriose                 | 2.1  |

442  
443  
444



445 **Figure Legends**

446

447 **Figure 1.** Experimental overview for evaluating effects of mannanase-hydrolysis of  
448 copra meal (MCM) as immunostimulant in Pacific white shrimp, *Litopenaeus vannamei*  
449 in a grow-out pond. The Pacific white shrimp postlarvae were divided into two groups:  
450 a control feed with commercial feed pellets and a 1% MCM-supplemented group. The  
451 intestine samples ( $N_{\text{pooled}} = 6$  with 5 replicates) were collected at 2- and 4- month of the  
452 feeding trial period for gene expression analysis.

453

454 **Figure 2.** Relative gene expression analysis of immune-related genes in intestines of  
455 Pacific white shrimp after 2-month and 4-month feeding period with the mannanase-  
456 hydrolyzed coprameal-supplemented diet group (MCM). The fold changes of transcript  
457 of antimicrobial peptides (*alf1*, *pen3a* and *crus*), lysozyme (*lyz*), C-type lectin (*c-lectin*),  
458 and Toll-like receptor protein (*Toll1*) were determined by real-time PCR in relative to  
459 the control diet. An error bar represents standard deviation, which was calculated from  
460 five replicates for each sample. Asterisk indicates significant difference in fold-changes  
461 between groups fed with MCM and non-MCM containing diets ( $p < 0.05$ ).

462

463

**Fig 1**

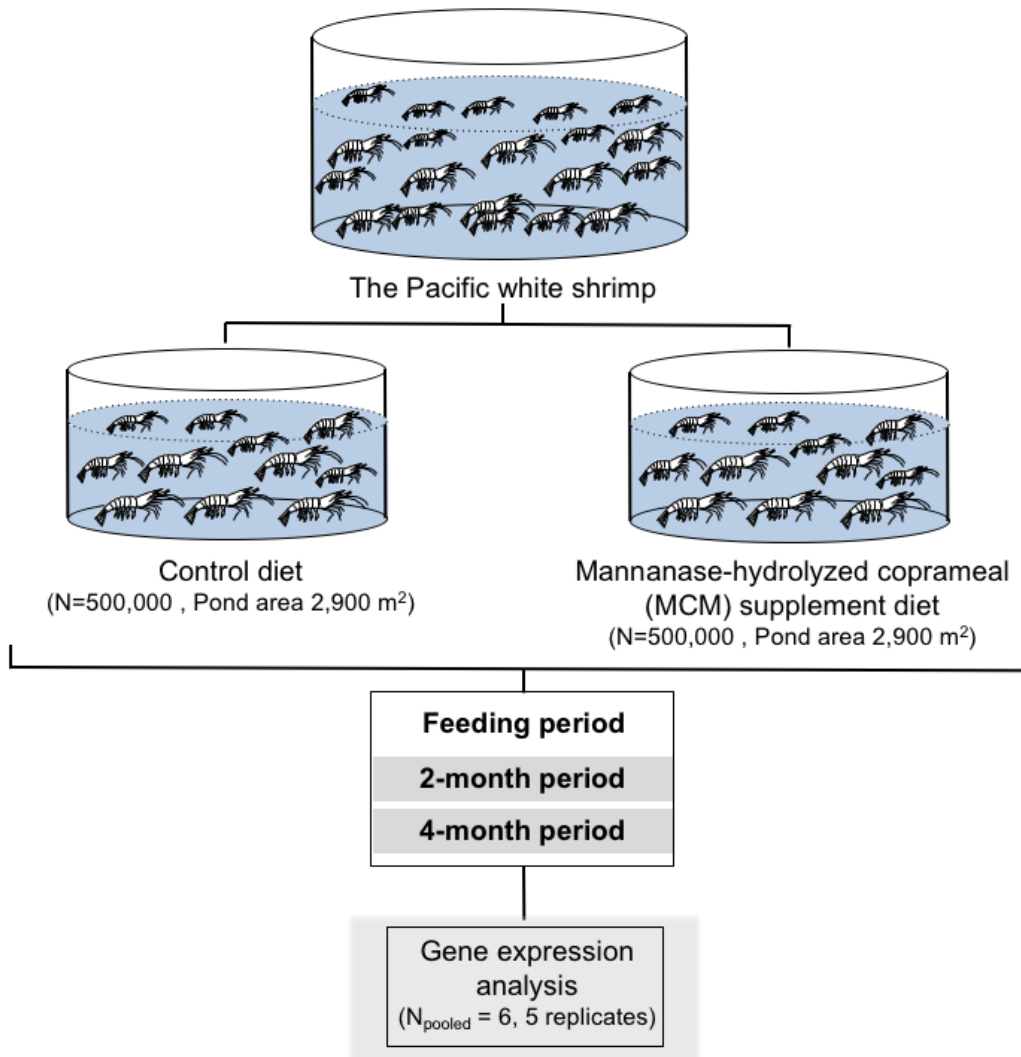

Fig. 2

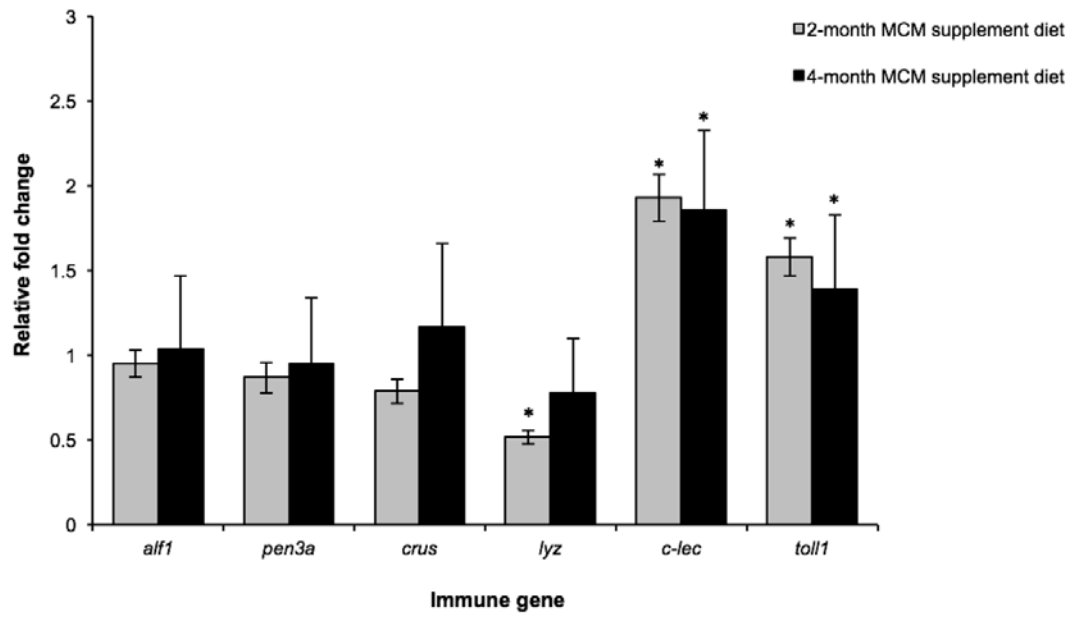

Source: https://biorxiv.org/content/10.1101/2021.02.16.431529v1.full.pdf
